# Supplementary material
Source: Springer Nature journal article supplement (http://www.springermedizin.de/resource/supplementary/12943_2013_1141_MOESM9_ESM.pdf/9552590)

**PKM1**  
**PKM2**  
**PKL**  
**Actin**

**HepG2**

**L6 (muscle cells)**

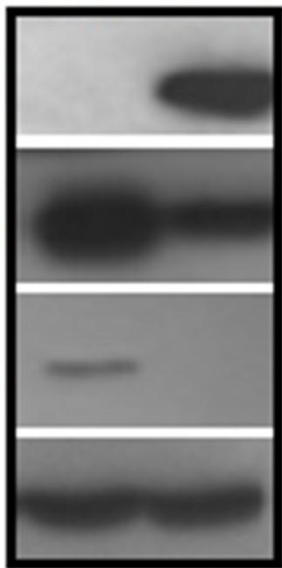

Supplement: MOESM9 [file 9552590]
